# Supplementary material for: Structural basis for translation termination by archaeal RF1 and GTP-bound EF1α complex
Source: PubMed Central journal article supplement — Nucleic Acids Res. 2012 Jul 5;40(18):9319–28. doi: 10.1093/nar/gks660 (PMC3467058; doi:10.1093/nar/gks660), 2012-07-05
Supplement: supp_gks660_nar-01165-r-2012-File010.pdf [file supp_gks660_nar-01165-r-2012-File010.pdf]

# Supplementary Figures

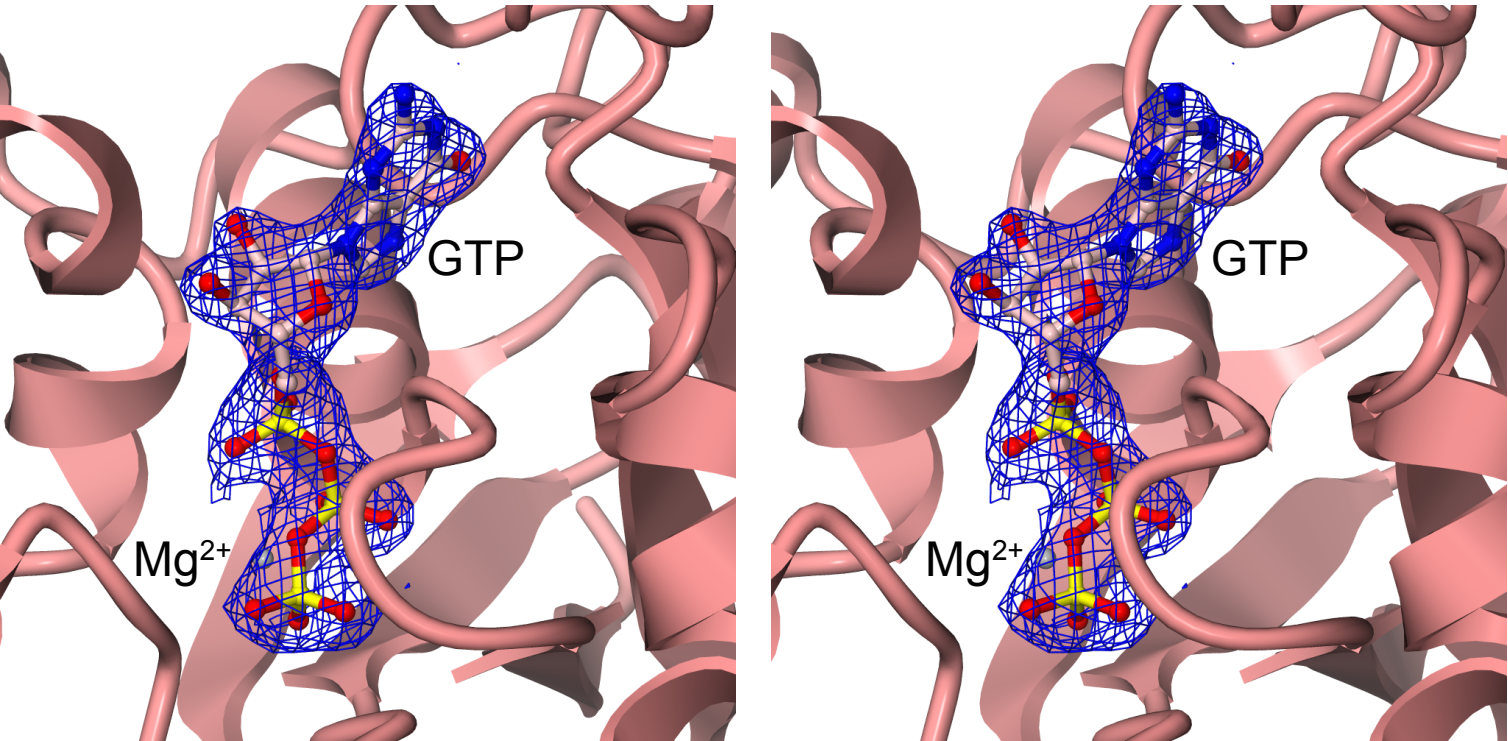

Fig. S1

**A**

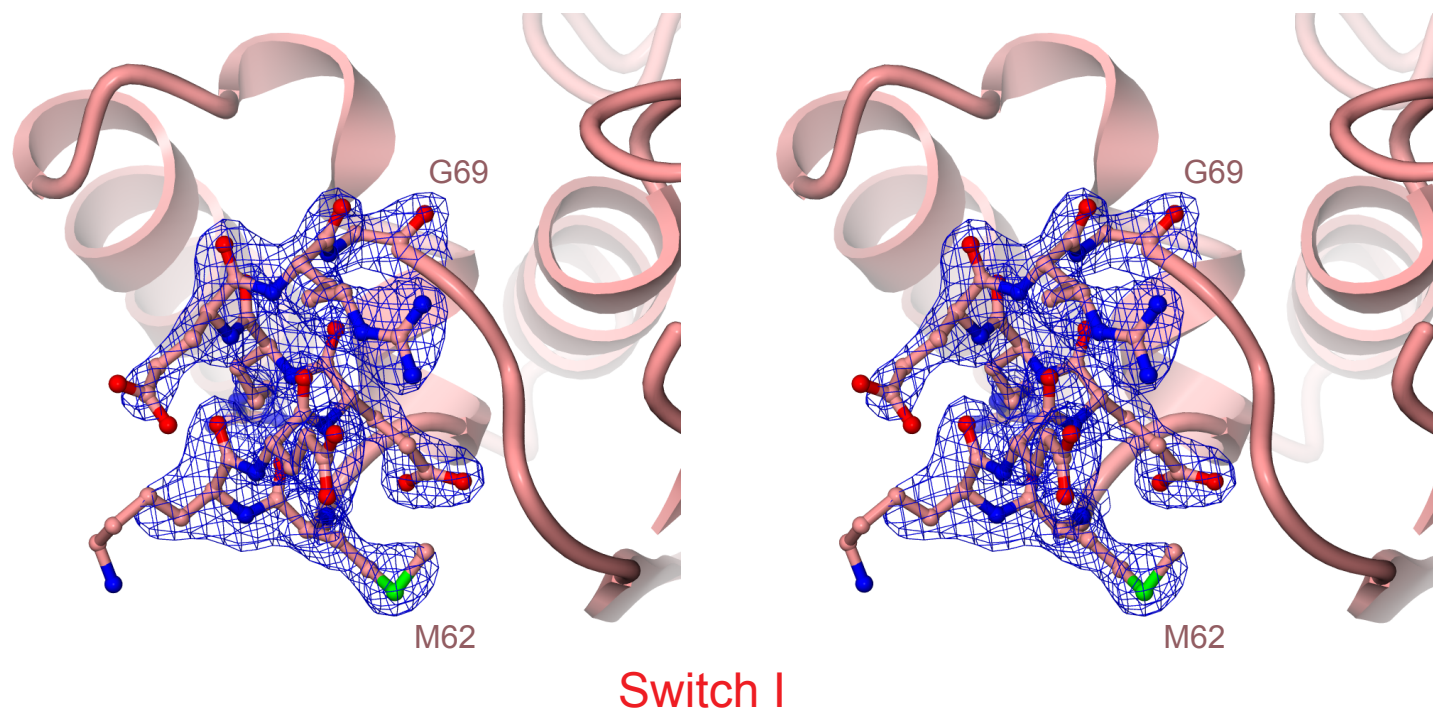

**B**

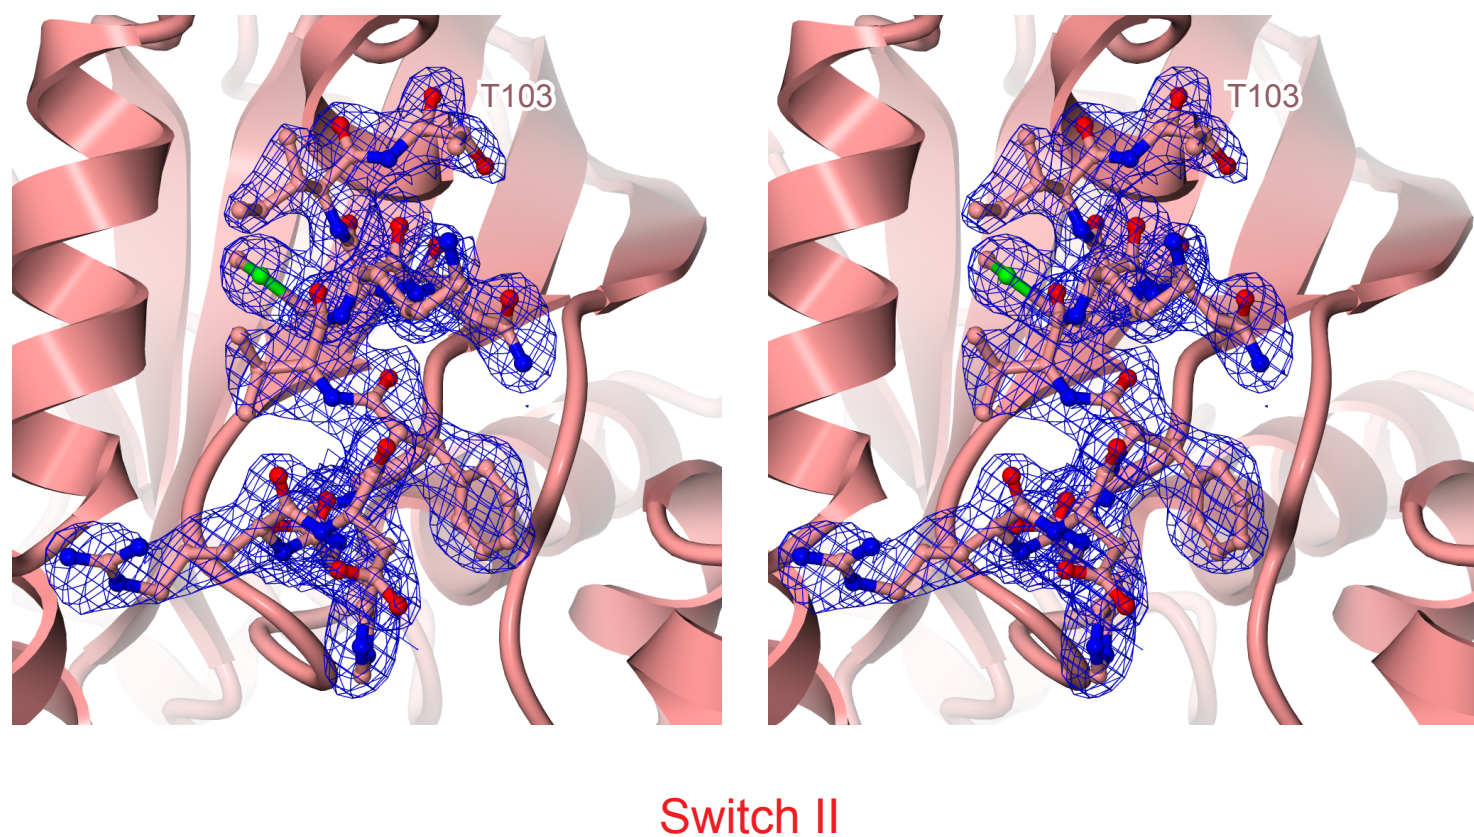

Fig. S2

## Supplementary Figure Legends

### Fig. S1

Stereo view of the electron density map of the GTP bound to aEF1 $\alpha$ . The  $2F_O-F_C$  electron density map of GTP bound to aEF1 $\alpha$ , contoured at 1.5  $\sigma$ , is shown. The GTP and Mg<sup>2+</sup> ion are depicted by ball-and-stick models.

### Fig. S2

Stereo views of the electron density maps of the switch regions of aEF1 $\alpha$ .

- (A) The  $2F_O-F_C$  electron density map of the switch I region of aEF1 $\alpha$ , contoured at 1.5  $\sigma$ . Residues 62-69 of aEF1 $\alpha$  are depicted by ball-and-stick models.
- (B) The  $2F_O-F_C$  electron density map of the switch II region of aEF1 $\alpha$ , contoured at 1.5  $\sigma$ . Residues 93-103 of aEF1 $\alpha$  are depicted by ball-and-stick models.

## Tables

## Table S1

## Data collection statistics

| Data collection statistics  | Native                                                                   |
|-----------------------------|--------------------------------------------------------------------------|
| X-ray source                | SPring-8 BL32XU                                                          |
| Wavelength (Å)              | 1.0                                                                      |
| Space group                 | <i>C</i> 2                                                               |
| Unit cell dimensions (Å, °) | $a = 176.6, b = 55.2, c = 90.7$<br>$\alpha = \gamma = 90, \beta = 101.6$ |
| Resolution (Å)              | 50–2.30<br>(2.34–2.30)                                                   |
| Unique reflections          | 38,192 (1,866)                                                           |
| Redundancy                  | 5.7 (3.9)                                                                |
| Completeness (%)            | 98.9 (97.2)                                                              |
| $I/\sigma(I)$               | 37.7 (3.82)                                                              |
| $R_{\text{sym}}$            | 0.063 (0.282)                                                            |

The numbers in parentheses are for the last shell.

Table S2

Structure refinement statistics

| Refinement statistics                |               |
|--------------------------------------|---------------|
| Resolution (Å)                       | 46.498–2.30   |
| No. of reflections (all/test)        | 37988/1906    |
| $R_{\text{work}}/R_{\text{free}}$    | 0.2013/0.2606 |
| No. of atoms                         |               |
| Protein                              | 5961          |
| Ligand                               | 33            |
| Ion                                  | 5             |
| Water                                | 162           |
| RMSD of                              |               |
| Bond length (Å)                      | 0.009         |
| Bond angle (°)                       | 1.202         |
| Average $B$ factor (Å <sup>2</sup> ) |               |
| Protein                              | 50.9          |
| Ligand                               | 40.9          |
| Ion                                  | 61.6          |
| Water                                | 46.7          |
| Ramachandran plot                    |               |
| Favored (%)                          | 98.58         |
| Outliers (%)                         | 0.00          |
